# Supplementary material
Source: HighWire-hosted journal article supplement (https://bmjopen.bmj.com/content/10/11/e040223)

Supplementary Material: A Systematic Review of international Delphi surveys for Core Outcome Set development: representation of international patients.

Appendix 4. Percentage of studies coded as each of the disease categories listed in the COMET database.

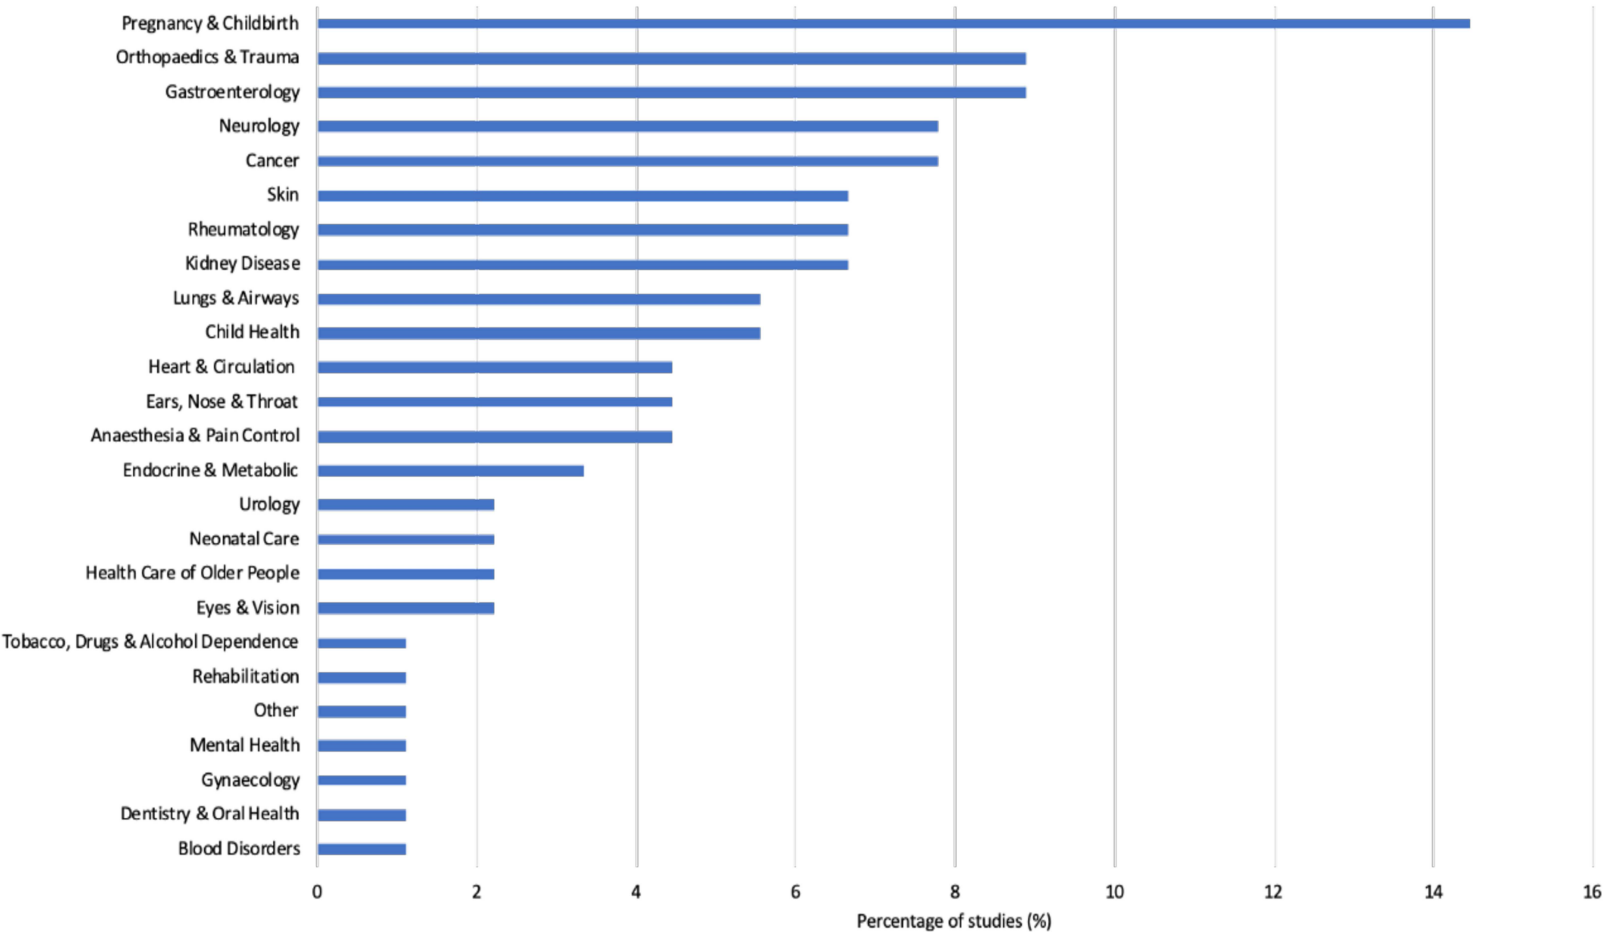

Supplement: inline-supplementary-material-3 [file inline-supplementary-material-3.pdf]
